# Supplementary material for: A comparison of the transport kinetics of glycine transporter 1 and glycine transporter 2
Source: PubMed Central journal article supplement — J Gen Physiol. 2019 Jul 3;151(8):1035–50. doi: 10.1085/jgp.201912318 (PMC6683666; doi:10.1085/jgp.201912318), 2019-07-03
Supplement: JGP_201912318_sm.pdf [file JGP_201912318_sm.pdf]

## Supplemental material

Erdem et al., <https://doi.org/10.1085/jgp.201912318>

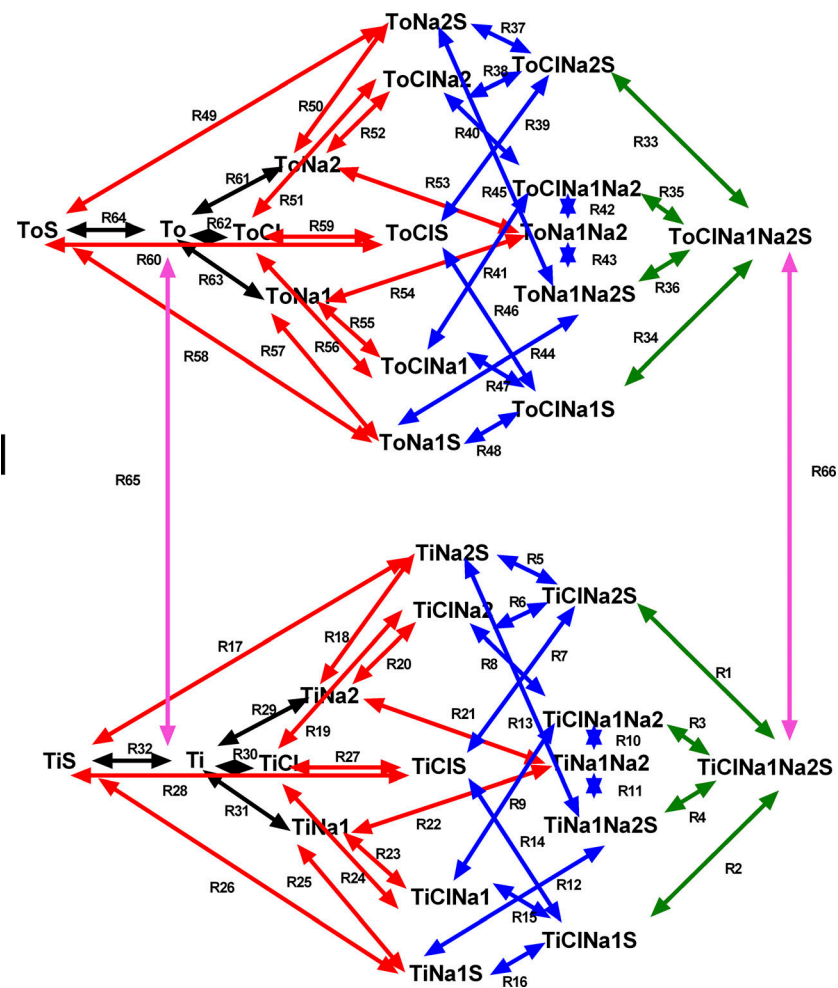

Figure S1. **Kinetic scheme for GlyT1.** The rate constants are indicated Table S1. Substrate and cosubstrates are allowed to bind to the transporter in random order. Cooperativity is incorporated by the use of a Coop. This factor is multiplied with the corresponding dissociation rates.  $z$  is indicated in Fig. 7. To reduce the number of states in the GlyT1 model, we allowed for filling of the Na site by sodium only after three ligands had already bound to the transporter. For a better overview, specific colors were assigned to reactions depending on the load of the states, i.e., black indicates one cargo (the substrate or one of the cosubstrates) bound to the transporter; red, binding of a second cargo; blue, binding of a third cargo; green, binding of the fourth cargo. Note that double arrows look like star-shaped symbols due to space limitations in the scheme.

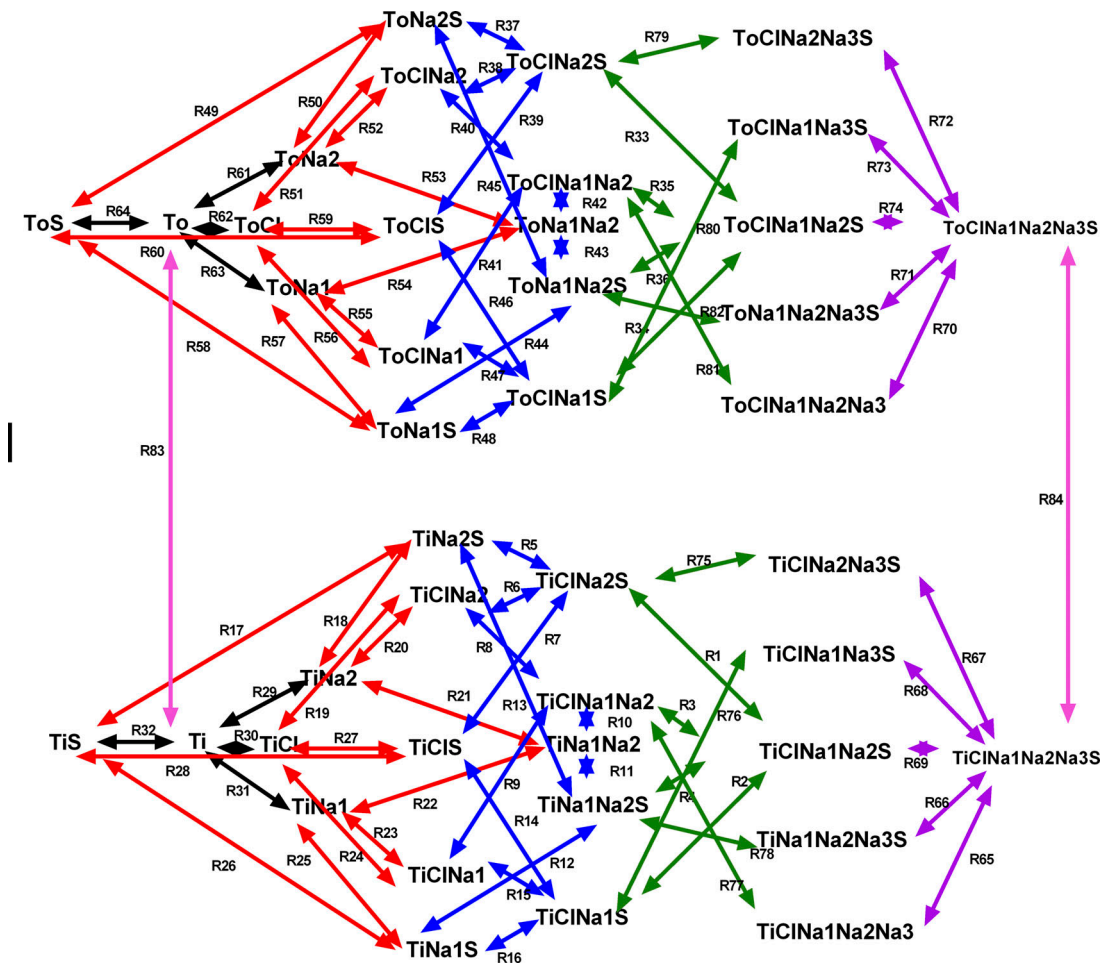

Figure S2. **Kinetic scheme for GlyT2.** The rate constants are indicated in Table S2. Substrate and cosubstrates are allowed to bind to the transporter in random order. Coop is multiplied with the corresponding dissociation rates.  $z$  is indicated in Fig. 7. To reduce the number of states in the GlyT2 model, we allowed for filling of the Na3 site by sodium only after three ligands had already bound to the transporter. The same color coding was applied as in Fig. S1; purple indicates the binding of the fifth cargo (one of the cosubstrates or the substrate). Note that double arrows look like star-shaped symbols due to space limitations in the scheme.

Table S1. **GlyT1 model**

| <b>Reactions (GlyT1 model)</b>  | <b>Forward rate (<math>s^{-1}</math> or <math>s^{-1}M^{-1}</math>)</b> | <b>Backward rate (<math>s^{-1}</math>)</b> |
|---------------------------------|------------------------------------------------------------------------|--------------------------------------------|
| R1: TiClNa2S <-> TiClNa1Na2S    | $3 \cdot 10^6$                                                         | $10^3$                                     |
| R2: TiClNa1S <-> TiClNa1Na2S    | $3 \cdot 10^6$                                                         | $10^3$                                     |
| R3: TiClNa1Na2 <-> TiClNa1Na2S  | $6 \cdot 10^6$                                                         | 200                                        |
| R4: TiNa1Na2S <-> TiClNa1Na2S   | $10^6$                                                                 | $10^4$                                     |
| R5: TiNa2S <-> TiClNa2S         | $10^6$                                                                 | $10^{4*}$ Coop                             |
| R6: TiClNa2 <-> TiClNa2S        | $6 \cdot 10^6$                                                         | $200 \cdot$ Coop                           |
| R7: TiClS <-> TiClNa2S          | $3 \cdot 10^6$                                                         | $10^{3*}$ Coop                             |
| R8: TiClNa2 <-> TiClNa1Na2      | $3 \cdot 10^6$                                                         | $10^{3*}$ Coop                             |
| R9: TiClNa1 <-> TiClNa1Na2      | $3 \cdot 10^6$                                                         | $10^{3*}$ Coop                             |
| R10: TiNa1Na2 <-> TiClNa1Na2    | $10^6$                                                                 | $10^{4*}$ Coop                             |
| R11: TiNa1Na2 <-> TiNa1Na2S     | $6 \cdot 10^6$                                                         | $200 \cdot$ Coop                           |
| R12: TiNa1S <-> TiNa1Na2S       | $3 \cdot 10^6$                                                         | $10^{3*}$ Coop                             |
| R13: TiNa2S <-> TiNa1Na2S       | $3 \cdot 10^6$                                                         | $10^{3*}$ Coop                             |
| R14: TiClS <-> TiClNa1S         | $3 \cdot 10^6$                                                         | $10^{3*}$ Coop                             |
| R15: TiClNa1 <-> TiClNa1S       | $6 \cdot 10^6$                                                         | $200 \cdot$ Coop                           |
| R16: TiNa1S <-> TiClNa1S        | $10^6$                                                                 | $10^{4*}$ Coop                             |
| R17: TiS <-> TiNa2S             | $3 \cdot 10^6$                                                         | $10^{3*}$ Coop                             |
| R18: TiNa2 <-> TiNa2S           | $6 \cdot 10^6$                                                         | $200 \cdot$ Coop                           |
| R19: TiCl <-> TiClNa2           | $3 \cdot 10^6$                                                         | $10^{3*}$ Coop                             |
| R20: TiNa2 <-> TiClNa2          | $10^6$                                                                 | $10^{4*}$ Coop                             |
| R21: TiNa2 <-> TiNa1Na2         | $3 \cdot 10^6$                                                         | $10^{3*}$ Coop                             |
| R22: TiNa1 <-> TiNa1Na2         | $3 \cdot 10^6$                                                         | $10^{3*}$ Coop                             |
| R23: TiNa1 <-> TiClNa1          | $10^6$                                                                 | $10^{4*}$ Coop                             |
| R24: TiCl <-> TiClNa1           | $3 \cdot 10^6$                                                         | $10^{3*}$ Coop                             |
| R25: TiNa1 <-> TiNa1S           | $6 \cdot 10^6$                                                         | $200 \cdot$ Coop                           |
| R26: TiS <-> TiNa1S             | $3 \cdot 10^6$                                                         | $10^{3*}$ Coop                             |
| R27: TiCl <-> TiClS             | $6 \cdot 10^6$                                                         | $200 \cdot$ Coop                           |
| R28: TiS <-> TiClS              | $10^6$                                                                 | $10^{4*}$ Coop                             |
| R29: Ti <-> TiNa2               | $3 \cdot 10^6$                                                         | $10^{3*}$ Coop                             |
| R30: Ti <-> TiCl                | $10^6$                                                                 | $10^{4*}$ Coop                             |
| R31: Ti <-> TiNa1               | $3 \cdot 10^6$                                                         | $10^{3*}$ Coop                             |
| R32: Ti <-> TiS                 | $6 \cdot 10^6$                                                         | $200 \cdot$ Coop                           |
| R33: ToClNa2S <-> ToClNa1Na2S   | $3 \cdot 10^6$                                                         | $10^3$                                     |
| R34: ToClNa1S <-> ToClNa1Na2S   | $3 \cdot 10^6$                                                         | $10^3$                                     |
| R35: ToClNa1Na2 <-> ToClNa1Na2S | $6 \cdot 10^6$                                                         | 200                                        |
| R36: ToNa1Na2S <-> ToClNa1Na2S  | $10^6$                                                                 | $10^4$                                     |
| R37: ToNa2S <-> ToClNa2S        | $10^6$                                                                 | $10^{4*}$ Coop                             |
| R38: ToClNa2 <-> ToClNa2S       | $6 \cdot 10^6$                                                         | $200 \cdot$ Coop                           |
| R39: ToClS <-> ToClNa2S         | $3 \cdot 10^6$                                                         | $10^{3*}$ Coop                             |
| R40: ToClNa2 <-> ToClNa1Na2     | $3 \cdot 10^6$                                                         | $10^{3*}$ Coop                             |
| R41: ToClNa1 <-> ToClNa1Na2     | $3 \cdot 10^6$                                                         | $10^{3*}$ Coop                             |
| R42: ToNa1Na2 <-> ToClNa1Na2    | $10^6$                                                                 | $10^{4*}$ Coop                             |
| R43: ToNa1Na2 <-> ToNa1Na2S     | $6 \cdot 10^6$                                                         | $200 \cdot$ Coop                           |
| R44: ToNa1S <-> ToNa1Na2S       | $3 \cdot 10^6$                                                         | $10^{3*}$ Coop                             |

Table S1. **GlyT1 model (Continued)**

| <b>Reactions (GlyT1 model)</b>   | <b>Forward rate (s<sup>-1</sup> or s<sup>-1</sup>*M<sup>-1</sup>)</b> | <b>Backward rate (s<sup>-1</sup>)</b> |
|----------------------------------|-----------------------------------------------------------------------|---------------------------------------|
| R45: ToNa2S <-> ToNa1Na2S        | 3*10 <sup>6</sup>                                                     | 10 <sup>3</sup> *Coop                 |
| R46: ToClS <-> ToClNa1S          | 3*10 <sup>6</sup>                                                     | 10 <sup>3</sup> *Coop                 |
| R47: ToClNa1 <-> ToClNa1S        | 6*10 <sup>6</sup>                                                     | 200*Coop                              |
| R48: ToNa1S <-> ToClNa1S         | 10 <sup>6</sup>                                                       | 10 <sup>4</sup> *Coop                 |
| R49: ToS <-> ToNa2S              | 3*10 <sup>6</sup>                                                     | 10 <sup>3</sup> *Coop                 |
| R50: ToNa2 <-> ToNa2S            | 6*10 <sup>6</sup>                                                     | 200*Coop                              |
| R51: ToCl <-> ToClNa2            | 3*10 <sup>6</sup>                                                     | 10 <sup>3</sup> *Coop                 |
| R52: ToNa2 <-> ToClNa2           | 10 <sup>6</sup>                                                       | 10 <sup>4</sup> *Coop                 |
| R53: ToNa2 <-> ToNa1Na2          | 3*10 <sup>6</sup>                                                     | 10 <sup>3</sup> *Coop                 |
| R54: ToNa1 <-> ToNa1Na2          | 3*10 <sup>6</sup>                                                     | 10 <sup>3</sup> *Coop                 |
| R55: ToNa1 <-> ToClNa1           | 10 <sup>6</sup>                                                       | 10 <sup>4</sup> *Coop                 |
| R56: ToCl <-> ToClNa1            | 3*10 <sup>6</sup>                                                     | 10 <sup>3</sup> *Coop                 |
| R57: ToNa1 <-> ToNa1S            | 6*10 <sup>6</sup>                                                     | 200*Coop                              |
| R58: ToS <-> ToNa1S              | 3*10 <sup>6</sup>                                                     | 10 <sup>3</sup> *Coop                 |
| R59: ToCl <-> ToClS              | 6*10 <sup>6</sup>                                                     | 200*Coop                              |
| R60: ToS <-> ToClS               | 10 <sup>6</sup>                                                       | 10 <sup>4</sup> *Coop                 |
| R61: To <-> ToNa2                | 3*10 <sup>6</sup>                                                     | 10 <sup>3</sup> *Coop                 |
| R62: To <-> ToCl                 | 10 <sup>6</sup>                                                       | 10 <sup>4</sup> *Coop                 |
| R63: To <-> ToNa1                | 3*10 <sup>6</sup>                                                     | 10 <sup>3</sup> *Coop                 |
| R64: To <-> ToS                  | 6*10 <sup>6</sup>                                                     | 200*Coop                              |
| R65: To <-> Ti                   | 210                                                                   | 210                                   |
| R66: ToClNa1Na2S <-> TiClNa1Na2S | 70                                                                    | 70                                    |

Cooperativity factor, \*Coop = 50.

Table S2. **GlyT2 model**

| <b>Reactions (GlyT2 model)</b>  | <b>Forward rate (<math>s^{-1}</math> or <math>s^{-1}M^{-1}</math>)</b> | <b>Backward rate (<math>s^{-1}</math>)</b> |
|---------------------------------|------------------------------------------------------------------------|--------------------------------------------|
| R1: TiClNa2S <-> TiClNa1Na2S    | $10^6$                                                                 | $10^4 * Coop$                              |
| R2: TiClNa1S <-> TiClNa1Na2S    | $10^3$                                                                 | $300 * Coop$                               |
| R3: TiClNa1Na2 <-> TiClNa1Na2S  | $10^6$                                                                 | $100 * Coop$                               |
| R4: TiNa1Na2S <-> TiClNa1Na2S   | $10^6$                                                                 | $10^4 * Coop$                              |
| R5: TiNa2S <-> TiClNa2S         | $10^6$                                                                 | $10^4 * Coop$                              |
| R6: TiClNa2 <-> TiClNa2S        | $10^6$                                                                 | $100 * Coop$                               |
| R7: TiClS <-> TiClNa2S          | $10^3$                                                                 | $300 * Coop$                               |
| R8: TiClNa2 <-> TiClNa1Na2      | $10^4$                                                                 | $100 * Coop$                               |
| R9: TiClNa1 <-> TiClNa1Na2      | $10^3$                                                                 | $300 * Coop$                               |
| R10: TiNa1Na2 <-> TiClNa1Na2    | $10^6$                                                                 | $10^4 * Coop$                              |
| R11: TiNa1Na2 <-> TiNa1Na2S     | $10^6$                                                                 | $100 * Coop$                               |
| R12: TiNa1S <-> TiNa1Na2S       | $10^3$                                                                 | $300 * Coop$                               |
| R13: TiNa2S <-> TiNa1Na2S       | $10^4$                                                                 | $100 * Coop$                               |
| R14: TiClS <-> TiClNa1S         | $10^4$                                                                 | $100 * Coop$                               |
| R15: TiClNa1 <-> TiClNa1S       | $10^6$                                                                 | $100 * Coop$                               |
| R16: TiNa1S <-> TiClNa1S        | $10^6$                                                                 | $10^4 * Coop$                              |
| R17: TiS <-> TiNa2S             | $10^3$                                                                 | $300 * Coop$                               |
| R18: TiNa2 <-> TiNa2S           | $10^6$                                                                 | $100 * Coop$                               |
| R19: TiCl <-> TiClNa2           | $10^3$                                                                 | $300 * Coop$                               |
| R20: TiNa2 <-> TiClNa2          | $10^6$                                                                 | $10^4 * Coop$                              |
| R21: TiNa2 <-> TiNa1Na2         | $10^4$                                                                 | $100 * Coop$                               |
| R22: TiNa1 <-> TiNa1Na2         | $10^3$                                                                 | $300 * Coop$                               |
| R23: TiNa1 <-> TiClNa1          | $10^6$                                                                 | $10^4 * Coop$                              |
| R24: TiCl <-> TiClNa1           | $10^4$                                                                 | $100 * Coop$                               |
| R25: TiNa1 <-> TiNa1S           | $10^6$                                                                 | $100 * Coop$                               |
| R26: TiS <-> TiNa1S             | $10^4$                                                                 | $100 * Coop$                               |
| R27: TiCl <-> TiClS             | $10^6$                                                                 | $100 * Coop$                               |
| R28: TiS <-> TiClS              | $10^6$                                                                 | $10^4 * Coop$                              |
| R29: Ti <-> TiNa2               | $10^3$                                                                 | $300 * Coop$                               |
| R30: Ti <-> TiCl                | $10^6$                                                                 | $10^4 * Coop$                              |
| R31: Ti <-> TiNa1               | $10^4$                                                                 | $100 * Coop$                               |
| R32: Ti <-> TiS                 | $10^6$                                                                 | $100 * Coop$                               |
| R33: ToClNa2S <-> ToClNa1Na2S   | $10^4$                                                                 | $100 * Coop$                               |
| R34: ToClNa1S <-> ToClNa1Na2S   | $10^3$                                                                 | $300 * Coop$                               |
| R35: ToClNa1Na2 <-> ToClNa1Na2S | $10^6$                                                                 | $100 * Coop$                               |
| R36: ToNa1Na2S <-> ToClNa1Na2S  | $10^6$                                                                 | $10^4 * Coop$                              |
| R37: ToNa2S <-> ToClNa2S        | $10^6$                                                                 | $10^4 * Coop$                              |
| R38: ToClNa2 <-> ToClNa2S       | $10^6$                                                                 | $100 * Coop$                               |
| R39: ToClS <-> ToClNa2S         | $10^3$                                                                 | $300 * Coop$                               |
| R40: ToClNa2 <-> ToClNa1Na2     | $10^4$                                                                 | $100 * Coop$                               |
| R41: ToClNa1 <-> ToClNa1Na2     | $10^3$                                                                 | $300 * Coop$                               |
| R42: ToNa1Na2 <-> ToClNa1Na2    | $10^6$                                                                 | $10^4 * Coop$                              |
| R43: ToNa1Na2 <-> ToNa1Na2S     | $10^6$                                                                 | $100 * Coop$                               |
| R44: ToNa1S <-> ToNa1Na2S       | $10^3$                                                                 | $300 * Coop$                               |

Table S2. **GlyT2 model (Continued)**

| <b>Reactions (GlyT2 model)</b>         | <b>Forward rate (<math>s^{-1}</math> or <math>s^{-1}M^{-1}</math>)</b> | <b>Backward rate (<math>s^{-1}</math>)</b> |
|----------------------------------------|------------------------------------------------------------------------|--------------------------------------------|
| R45: ToNa2S <-> ToNa1Na2S              | $10^4$                                                                 | $100 * \text{Coop}$                        |
| R46: ToClS <-> ToClNa1S                | $10^6$                                                                 | $10^4 * \text{Coop}$                       |
| R47: ToClNa1 <-> ToClNa1S              | $10^6$                                                                 | $100 * \text{Coop}$                        |
| R48: ToNa1S <-> ToClNa1S               | $10^6$                                                                 | $10^4 * \text{Coop}$                       |
| R49: ToS <-> ToNa2S                    | $10^3$                                                                 | $300 * \text{Coop}$                        |
| R50: ToNa2 <-> ToNa2S                  | $10^6$                                                                 | $100 * \text{Coop}$                        |
| R51: ToCl <-> ToClNa2                  | $10^3$                                                                 | $300 * \text{Coop}$                        |
| R52: ToNa2 <-> ToClNa2                 | $10^6$                                                                 | $10^4 * \text{Coop}$                       |
| R53: ToNa2 <-> ToNa1Na2                | $10^4$                                                                 | $100 * \text{Coop}$                        |
| R54: ToNa1 <-> ToNa1Na2                | $10^3$                                                                 | $300 * \text{Coop}$                        |
| R55: ToNa1 <-> ToClNa1                 | $10^6$                                                                 | $10^4 * \text{Coop}$                       |
| R56: ToCl <-> ToClNa1                  | $10^4$                                                                 | $100 * \text{Coop}$                        |
| R57: ToNa1 <-> ToNa1S                  | $10^6$                                                                 | $100 * \text{Coop}$                        |
| R58: ToS <-> ToNa1S                    | $10^4$                                                                 | $100 * \text{Coop}$                        |
| R59: ToCl <-> ToClS                    | $10^6$                                                                 | $100 * \text{Coop}$                        |
| R60: ToS <-> ToClS                     | $10^6$                                                                 | $10^4 * \text{Coop}$                       |
| R61: To <-> ToNa2                      | $10^3$                                                                 | $300 * \text{Coop}$                        |
| R62: To <-> ToCl                       | $10^6$                                                                 | $10^4 * \text{Coop}$                       |
| R63: To <-> ToNa1                      | $10^4$                                                                 | $100 * \text{Coop}$                        |
| R64: To <-> ToS                        | $10^6$                                                                 | $100 * \text{Coop}$                        |
| R65: TiClNa1Na2Na3 <-> TiClNa1Na2Na3S  | $10^6$                                                                 | 100                                        |
| R66: TiNa1Na2Na3S <-> TiClNa1Na2Na3S   | $10^6$                                                                 | $10^4$                                     |
| R67: TiClNa2Na3S <-> TiClNa1Na2Na3S    | $10^4$                                                                 | 100                                        |
| R68: TiClNa1Na3S <-> TiClNa1Na2Na3S    | $10^3$                                                                 | 300                                        |
| R69: TiClNa1Na2S <-> TiClNa1Na2Na3S    | $10^5$                                                                 | 1000                                       |
| R70: ToClNa1Na2Na3 <-> ToClNa1Na2Na3S  | $10^6$                                                                 | 100                                        |
| R71: ToNa1Na2Na3S <-> ToClNa1Na2Na3S   | $10^6$                                                                 | $10^4$                                     |
| R72: ToClNa2Na3S <-> ToClNa1Na2Na3S    | $10^4$                                                                 | 100                                        |
| R73: ToClNa1Na3S <-> ToClNa1Na2Na3S    | $10^3$                                                                 | 300                                        |
| R74: ToClNa1Na2S <-> ToClNa1Na2Na3S    | $10^4$                                                                 | 100                                        |
| R75: TiClNa2S <-> TiClNa2Na3S          | $10^5$                                                                 | $1,000 * \text{Coop}$                      |
| R76: TiClNa2S <-> TiClNa1Na2S          | $10^4$                                                                 | $100 * \text{Coop}$                        |
| R77: TiClNa1Na2 <-> TiClNa1Na2Na3      | $10^5$                                                                 | $1,000 * \text{Coop}$                      |
| R78: TiNa1Na2 <-> TiNa1Na2Na3S         | $10^6$                                                                 | $100 * \text{Coop}$                        |
| R79: ToClNa2S <-> ToClNa2Na3S          | $10^4$                                                                 | $100 * \text{Coop}$                        |
| R80: ToClNa2S <-> ToClNa1Na2S          | $10^4$                                                                 | $100 * \text{Coop}$                        |
| R81: ToClNa1Na2 <-> ToClNa1Na2Na3      | $10^4$                                                                 | $100 * \text{Coop}$                        |
| R82: ToNa1Na2 <-> ToNa1Na2Na3          | $10^4$                                                                 | $100 * \text{Coop}$                        |
| R83: To <-> Ti                         | 300                                                                    | 300                                        |
| R84: ToClNa1Na2Na3S <-> TiClNa1Na2Na3S | 300                                                                    | 300                                        |

Cooperativity factor, \*Coop = 8.
